# Supplementary material for: International consensus: ovarian tissue cryopreservation in young Turner syndrome patients: outcomes of an ethical Delphi study including 55 experts from 16 different countries
Source: PubMed Central journal article supplement — Hum Reprod. 2020 Apr 29;35(5):1061–72. doi: 10.1093/humrep/deaa007 (PMC7493129; doi:10.1093/humrep/deaa007), 2020-04-29
Supplement: suppl_fig1_deaa007.pdf [file suppl_fig1_deaa007.pdf]

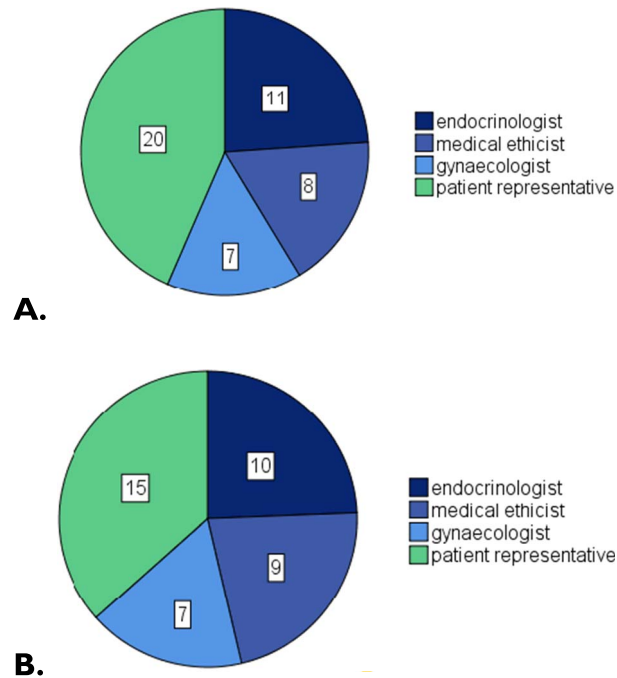

**Supplementary Figure S1** Participants in each Delphi round divided by subgroup. **(A)** Participants of the first Delphi round ( $n = 46$ ) divided by subgroup; (paediatric) endocrinologists ( $n = 11$ ), medical ethicists ( $n = 8$ ), gynaecologists ( $n = 7$ ) and patient representatives ( $n = 20$ ). **(B)** Participants of the second Delphi round ( $n = 41$ ) divided by subgroup; (paediatric) endocrinologists ( $n = 10$ ), medical ethicists ( $n = 9$ ), gynaecologists ( $n = 7$ ) and patient representatives ( $n = 15$ ).
