# Supplementary material for: International consensus: ovarian tissue cryopreservation in young Turner syndrome patients: outcomes of an ethical Delphi study including 55 experts from 16 different countries
Source: PubMed Central journal article supplement — Hum Reprod. 2020 Apr 29;35(5):1061–72. doi: 10.1093/humrep/deaa007 (PMC7493129; doi:10.1093/humrep/deaa007), 2020-04-29
Supplement: suppl_fig2_deaa007.pdf [file suppl_fig2_deaa007.pdf]

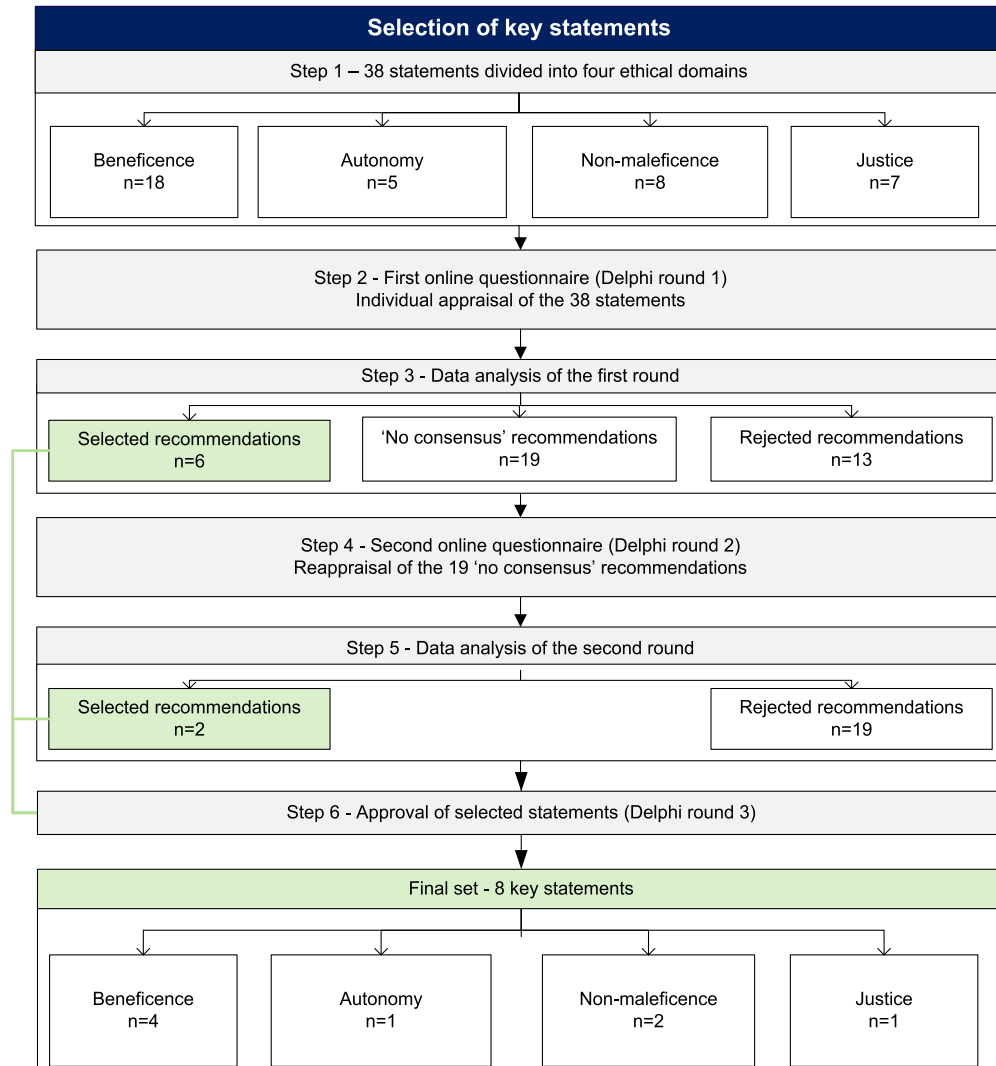

**Supplementary Figure S2** Detailed description of the selection of key statements in this three-round Delphi study.
