# Supplementary material for: International consensus: ovarian tissue cryopreservation in young Turner syndrome patients: outcomes of an ethical Delphi study including 55 experts from 16 different countries
Source: PubMed Central journal article supplement — Hum Reprod. 2020 Apr 29;35(5):1061–72. doi: 10.1093/humrep/deaa007 (PMC7493129; doi:10.1093/humrep/deaa007), 2020-04-29
Supplement: suppl_tab1_deaa007.pdf [file suppl_tab1_deaa007.pdf]

**Supplementary Table S1 Overview of the 38 statements divided over the four basic ethical themes that formed the basis of this Delphi study. In the first Delphi round 2 new statements were added (statement 39 and 40).**

| <b>THEME 1: BENEFICENCE</b>     |                                                                                                                                                                                                |
|---------------------------------|------------------------------------------------------------------------------------------------------------------------------------------------------------------------------------------------|
| 1                               | Infertility in women with Turner syndrome leads to psychological harm.                                                                                                                         |
| 2                               | Patients with Turner syndrome rate their own infertility as their primary concern.                                                                                                             |
| 3                               | The risk of infertility in patients with Turner syndrome has a negative impact on their intimate relationships and their chances at marriage.                                                  |
| 4                               | Fertility is an essential element of femininity and is linked to a woman's sense of identity.                                                                                                  |
| 5                               | There are other ways to become a parent besides having genetically own children.                                                                                                               |
| 6                               | Most women prefer biologic offspring.                                                                                                                                                          |
| 7                               | It is more difficult for women with Turner syndrome to adopt a child.                                                                                                                          |
| 8                               | Live birth rates are doubled in woman with Turner syndrome who used donor oocytes to become pregnant.                                                                                          |
| 9                               | Oocyte donation in women with Turner syndrome leads to significantly less chromosomal abnormalities in their offspring                                                                         |
| 10                              | Intrafamilial oocyte donation offers woman with Turner syndrome an option for genetically related offspring with reduced foetal risks.                                                         |
| 11                              | Intrafamilial oocyte donation could lead to imbalances in the relationship between patient, donor and child.                                                                                   |
| 12                              | Cryopreservation of oocytes is an established fertility preservation method for woman and post-pubertal girls, whereas ovarian tissue cryopreservation is still experimental.                  |
| 13                              | Cryopreservation of oocytes requires ovarian stimulation with exogenous FSH, whereas ovarian tissue cryopreservation does not.                                                                 |
| 14                              | Cryopreservation of oocytes requires transvaginal ultrasound guided oocyte retrieval, whereas ovarian tissue cryopreservation does not.                                                        |
| 15                              | Cryopreservation of oocytes can be performed only in girls who have had a spontaneous menarche, whereas ovarian tissue cryopreservation can be performed in both pre- and post-pubertal girls. |
| 16                              | Ovarian tissue preservation has been demonstrated as a successful fertility preservation option in other patient groups.                                                                       |
| 17                              | The germ cell loss will continue after auto transplantation of cryopreserved ovarian tissue.                                                                                                   |
| 18                              | The attempt to preserve a patient's fertility decreases the patient's psychological distress and promotes her psychological comfort.                                                           |
| <b>THEME 2: AUTONOMY</b>        |                                                                                                                                                                                                |
| 19                              | Most patients diagnosed with premature ovarian insufficiency express a desire for future offspring.                                                                                            |
| 20                              | Patients and parents are motivated to try experimental fertility preservation methods.                                                                                                         |
| 21                              | Young patients with Turner syndrome might be too immature to give informed consent for experimental fertility preservation methods.                                                            |
| 22                              | Regardless their age, girls with Turner syndrome should be included in the consent process for ovarian tissue cryopreservation.                                                                |
| 23                              | Fertility preservation could create expectations for the child to reproduce.                                                                                                                   |
| <b>THEME 3: NON-MALEFICENCE</b> |                                                                                                                                                                                                |
| 24                              | Pregnancies in women with Turner syndrome show higher rates of foetal complications.                                                                                                           |
| 25                              | Oocyte genetics or pre-implantation genetic screening can be used to screen oocytes and embryos.                                                                                               |
| 26                              | Pregnancies in women with Turner syndrome show higher rates of maternal complications.                                                                                                         |
| 27                              | Furthermore, pregnant women with Turner syndrome are at risk of severe cardiac complications and mortality.                                                                                    |
| 28                              | Ovarian tissue cryopreservation requires laparoscopic surgery.                                                                                                                                 |
| 29                              | Experimental fertility preservation options could create false hope, which could lead to psychological harm in the future.                                                                     |
| 30                              | A decisional conflict between the child and the parents could cause harm to their relationship.                                                                                                |
| 31                              | Performing ovarian tissue cryopreservation in paediatric patients upon parents' consent, may lead to both positive and negative feelings during adolescence of adulthood.                      |

(Continued)

---

**Supplementary Table S1 Continued.**

**THEME 4: JUSTICE**

- 32 Reproduction is a fundamental human right.
- 33 Patients at risk of premature ovarian insufficiency should have equal access to counselling and fertility preservation options.
- 34 Fertility preservation is a typical instance of 'medicalization'.
- 35 Ovarian tissue cryopreservation is also performed for non-medical reasons and social indications.
- 36 In some countries, ovarian tissue cryopreservation is already experimentally offered to girls with Turner syndrome.
- 37 Ovarian tissue cryopreservation remains financially out of reach for some patients.
- 38 Girls with Turner syndrome are less likely to get sexual education from their parents, due to their infertility.

**ADDITIONAL STATEMENTS**

- 39 Each girl with TS interested in OTC, should be discussed within a multidisciplinary expert team, after psychosocial and cardiologic screening have taken place.
- 40 Fertility preservation options might make us unhappier in the long run, because they contribute to a society where tragedy and human limitations are not accepted and are insurmountable problems.
-
